# Supplementary material
Source: MDPI journal article supplement (https://www.mdpi.com/2073-4344/9/9/699)
Supplement: s1 [file s1]

# Detoxification of Cyndrospermopsin by Pyrite in Water

Shulian Wang <sup>1,\*</sup>, Yongmei Chen <sup>2</sup>, Yiying Jiao <sup>1</sup> and Zhu Li <sup>1</sup>

<sup>1</sup> Hubei Key Laboratory of Ecological Remediation for Rivers-Lakes and Algal Utilization, School of Civil Engineering, Architecture and Environment, Hubei University of Technology, Wuhan 430068, China

<sup>2</sup> Wuhan Vocational College of Software Engineering, Wuhan 430205, China

\* Correspondence: wangshulian@hbut.edu.cn; Tel.: +86-13006105245

## Supporting Figures

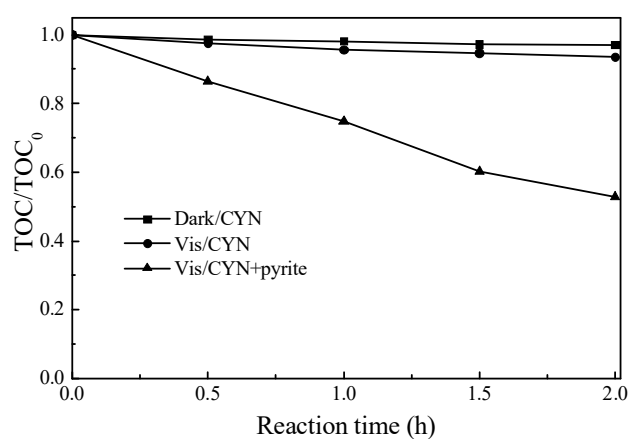

**Figure S1.** Determination of TOC during CYN degradation. CYN concentration = 2 mg/L; pyrite dose = 0.5 g/L.

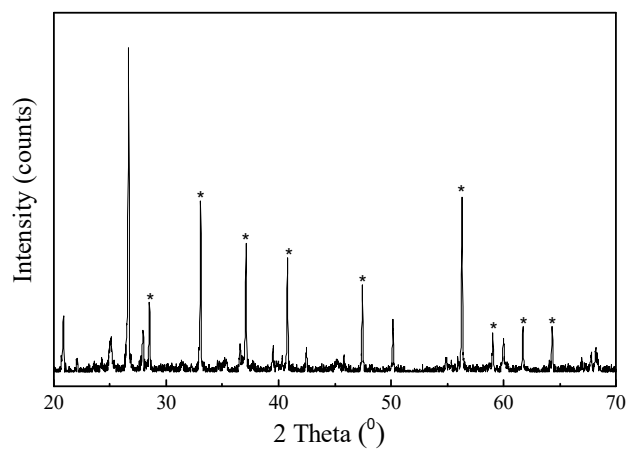

**Figure S2.** XRD pattern of pyrite. The positions and intensities of the diffraction lines of pyrite (JCPDS 42-1340) are indicated by marks just above the horizontal axis.

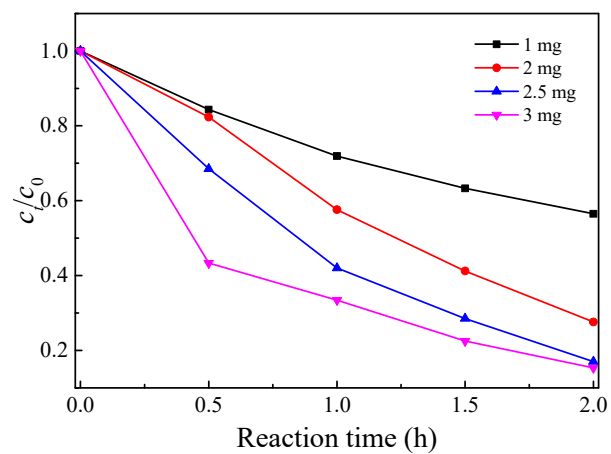

**Figure S3.** Effect of pyrite dosage on the degradation effect of CYN. CYN concentration = 2 mg/L.

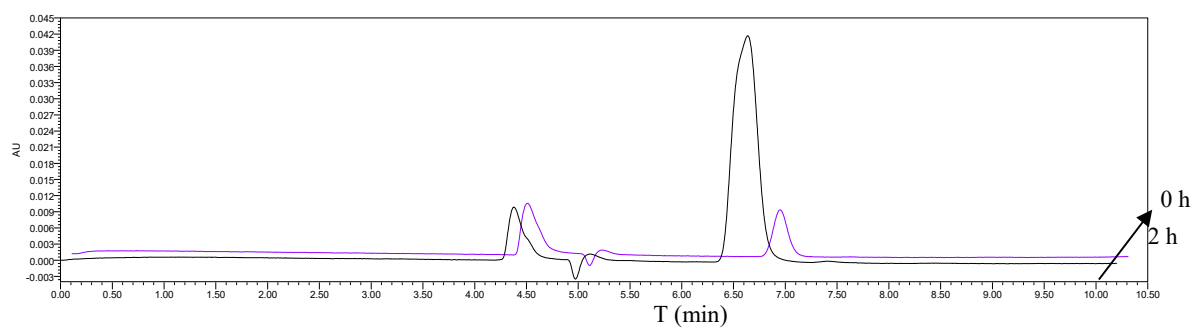

**Figure S4.** Concentration change of CYN before (0 h) and after (2 h) degradation.
